# Supplementary material
Source: PubMed Central journal article supplement (PMC5033632)

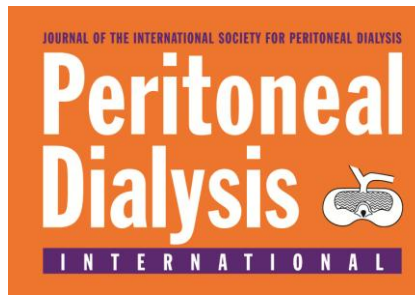

## Supplemental Materials for

### **A new method to increase ultrafiltration in peritoneal dialysis: Steady Concentration Peritoneal Dialysis**

Vicente Pérez-Díaz, Alfonso Pérez-Escudero, Sandra Sanz-Ballesteros, Guadalupe Rodríguez-Portela, Susana Valenciano-Martínez, Sofía Palomo-Aparicio, Esther Hernández-García, Luisa Sánchez-García, Raquel Gordillo-Martín, Hortensia Marcos-Sánchez

#### **Switching to Baxter Luer connector**

To insert a Baxter connector in a non-Baxter system without damaging the peritoneal catheter, we adapted a catheter extension set with the following procedure, performed in a sterile environment and with sterile materials (see figure with initial and final situation and material necessary). First, we clamped the tube of the extension set near its proximal end (the side that connects to the patient's catheter). Then we sterilized for 2 minutes the middle part of the tubing with povidone, and cut it through the middle with a scalpel. We discarded the distal half of the extension set and submerged for 10 minutes the cut end of the proximal half into povidone to ensure sterility. Then we inserted a titanium adaptor in the cut end and connected it to a Baxter extension set with its Luer connector. For all other manipulations and connections we used standard PD procedures.

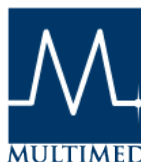

Supplemental Figure 1:

## SWITCHING TO BAXTER TIP

Material and initial situation

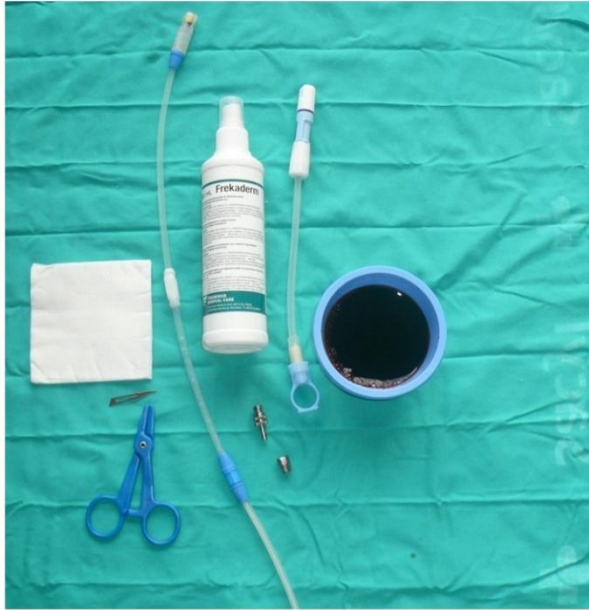

Final situation

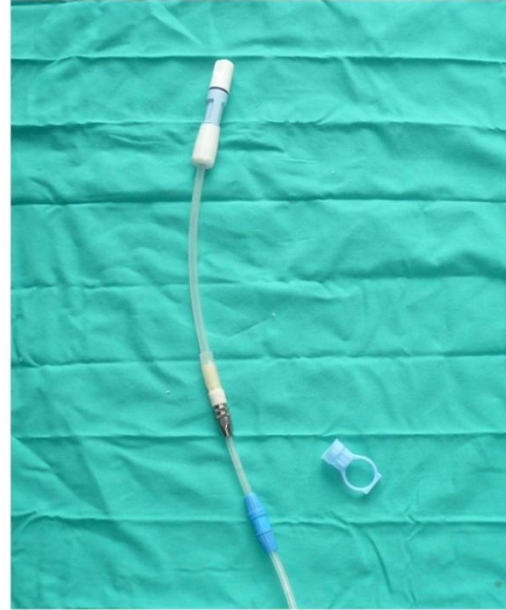

**Correspondence and requests for materials should be addressed to:**

Vicente Pérez-Díaz. Servicio de Nefrología. Hospital Clínico Universitario de Valladolid. Avenida Ramón y Cajal 3. 47003 Valladolid. Spain. Phone: +34 983 420003 ext 86121. Fax: +34 983 257 511. E-mail: [vperez5651@gmail.com](mailto:vperez5651@gmail.com).

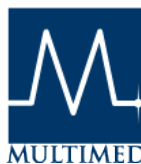

Supplement: supp_2016.00007_Supplemental_Materials.pdf [file supp_2016.00007_Supplemental_Materials.pdf]
